# Supplementary material
Source: publisher figshare collection journal article supplement (https://acs.figshare.com/ndownloader/files/4241281)
Supplement: Supplementary file 1 [file 4241281]

# ***Supporting Information***

## **Core/shell Cu@Ag nanoparticle: A versatile platform for colorimetric visualization of inorganic anions**

*Jia Zhang,<sup>1,2</sup> Yue Yuan,<sup>1</sup> Xiaowen Xu,<sup>1,2</sup> Xiaolei Wang,<sup>1</sup> and Xiurong Yang<sup>\*1</sup>*

<sup>1</sup>State Key Laboratory of Electroanalytical Chemistry, Changchun Institute of Applied Chemistry,  
Chinese Academy of Sciences, Changchun 130022, Jilin, China

<sup>2</sup>Graduate School of the Chinese Academy of Sciences, Beijing 100049, China

\*E-mail: [xryang@ciac.jl.cn](mailto:xryang@ciac.jl.cn); Fax: +86 431 85269278

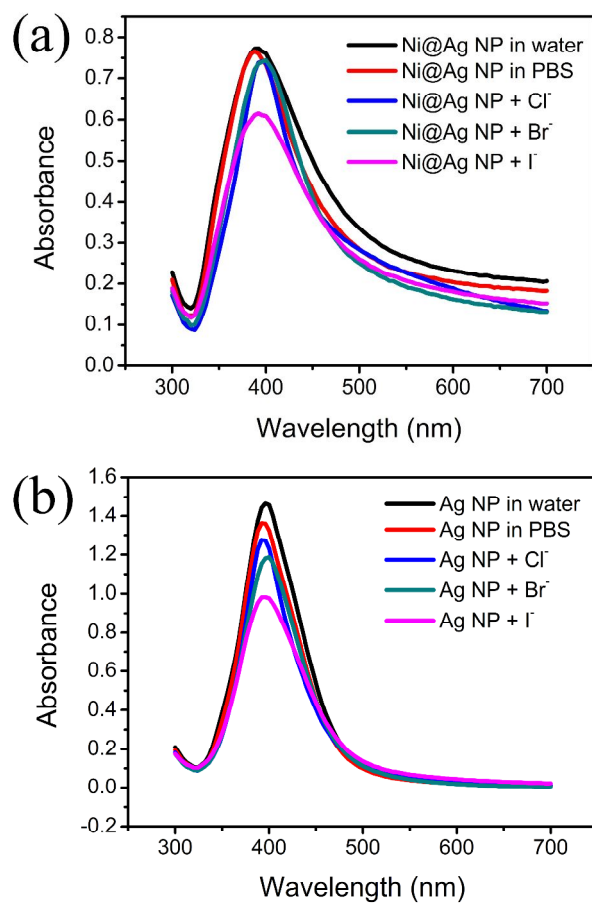

**Figure S1.** The optical spectra for (a) the Ni@Ag NP and (b) Ag NP solutions after interaction with anions. The concentrations of Cl<sup>-</sup>, Br<sup>-</sup>, and I<sup>-</sup> are 1 mM, 10  $\mu$ M, and 10  $\mu$ M, respectively.

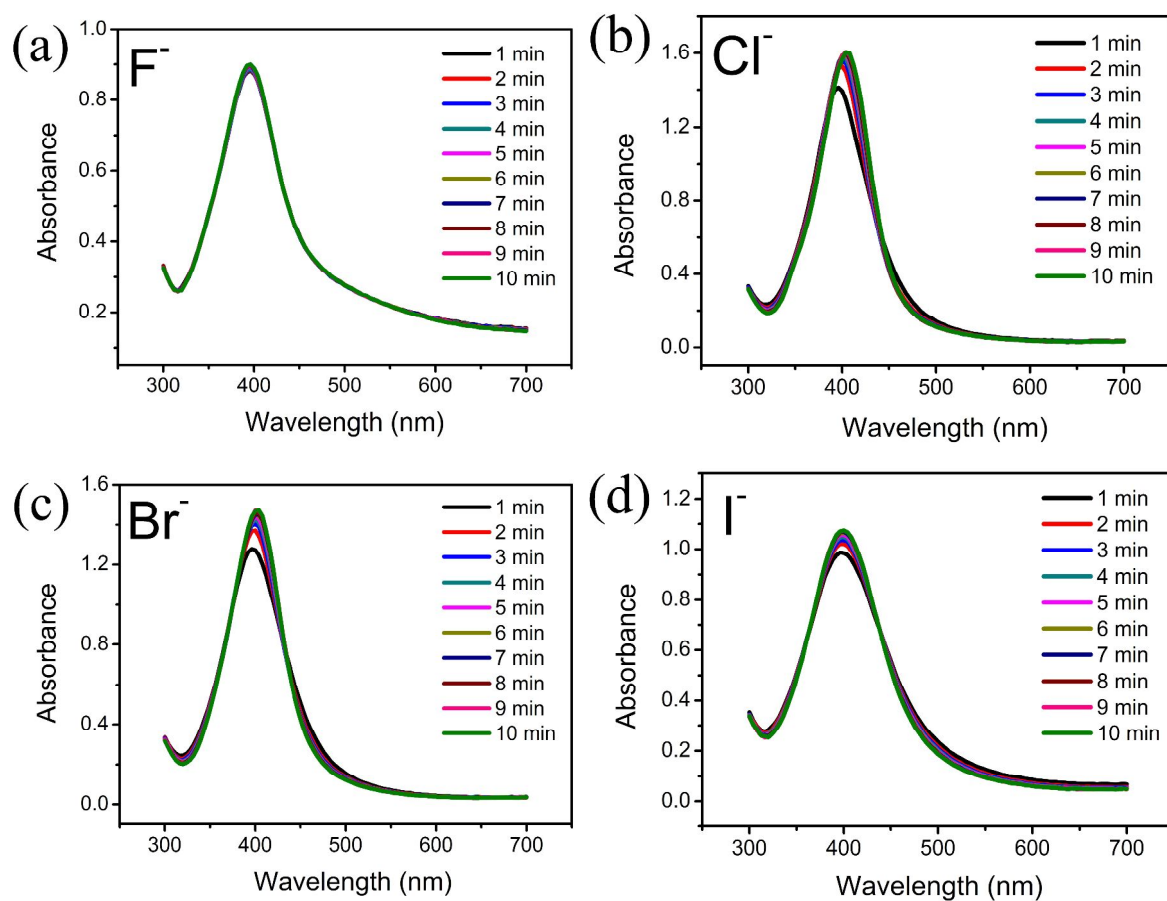

**Figure S2.** Time-dependent optical spectra for the Cu@Ag NP solution in the presence of (a)  $\text{F}^-$  (1 mM), (b)  $\text{Cl}^-$  (1 mM), (c)  $\text{Br}^-$  (10  $\mu\text{M}$ ), and (d)  $\text{I}^-$  (10  $\mu\text{M}$ ), pH 5.2.

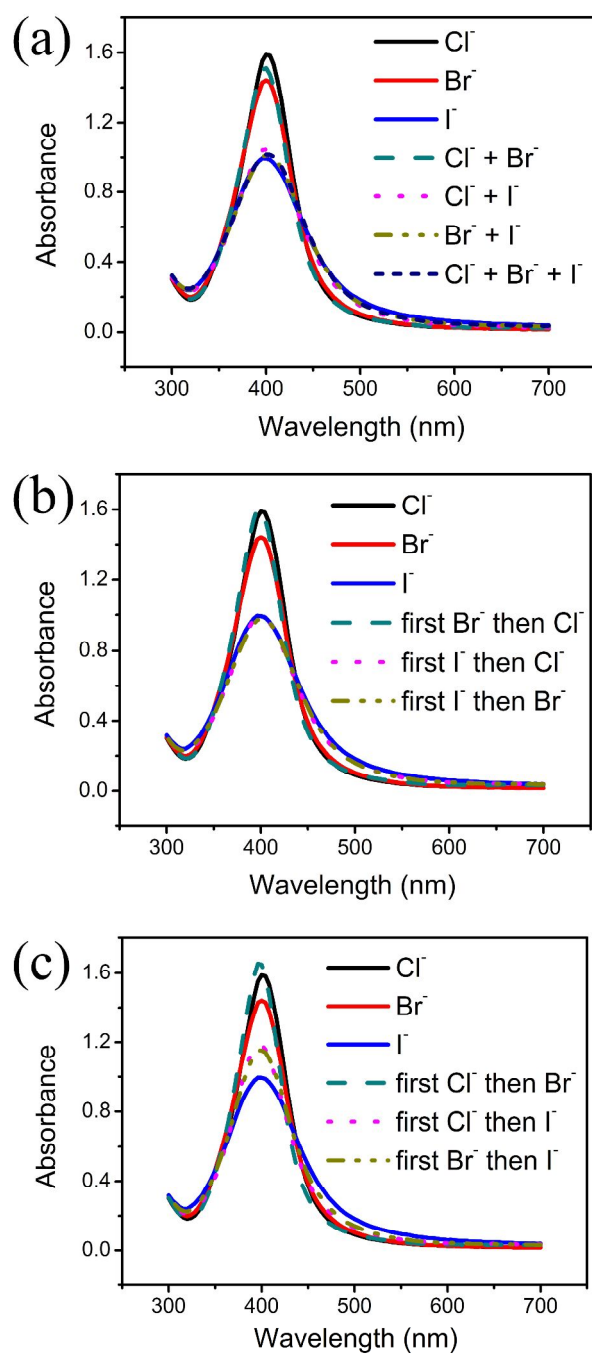

**Figure S3.** The optical spectra for the Cu@Ag NP solution in the presence of individual halides and mixtures of halides, pH 5.2.

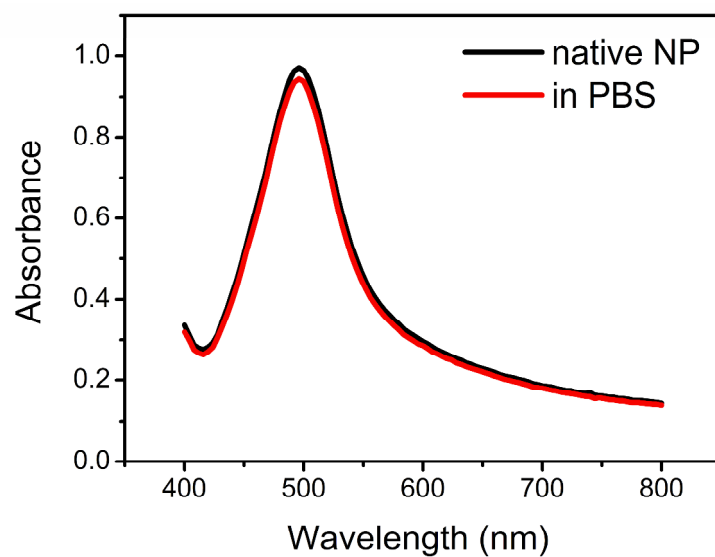

**Figure S4.** The optical spectra for the native Cu@Ag NP solution and the PBS buffered NP solution.

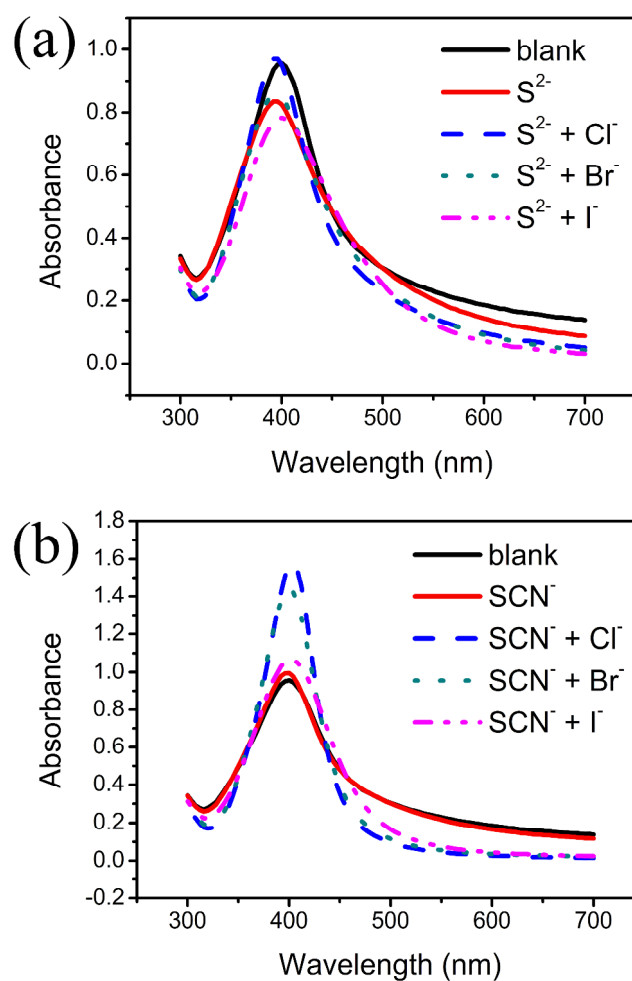

**Figure S5.** The optical spectra for the Cu@Ag NP solution in the presence of (a) sulfide and mixtures of sulfide with halides; (b) thiocyanate and mixture of thiocyanate with halides, pH 5.2.

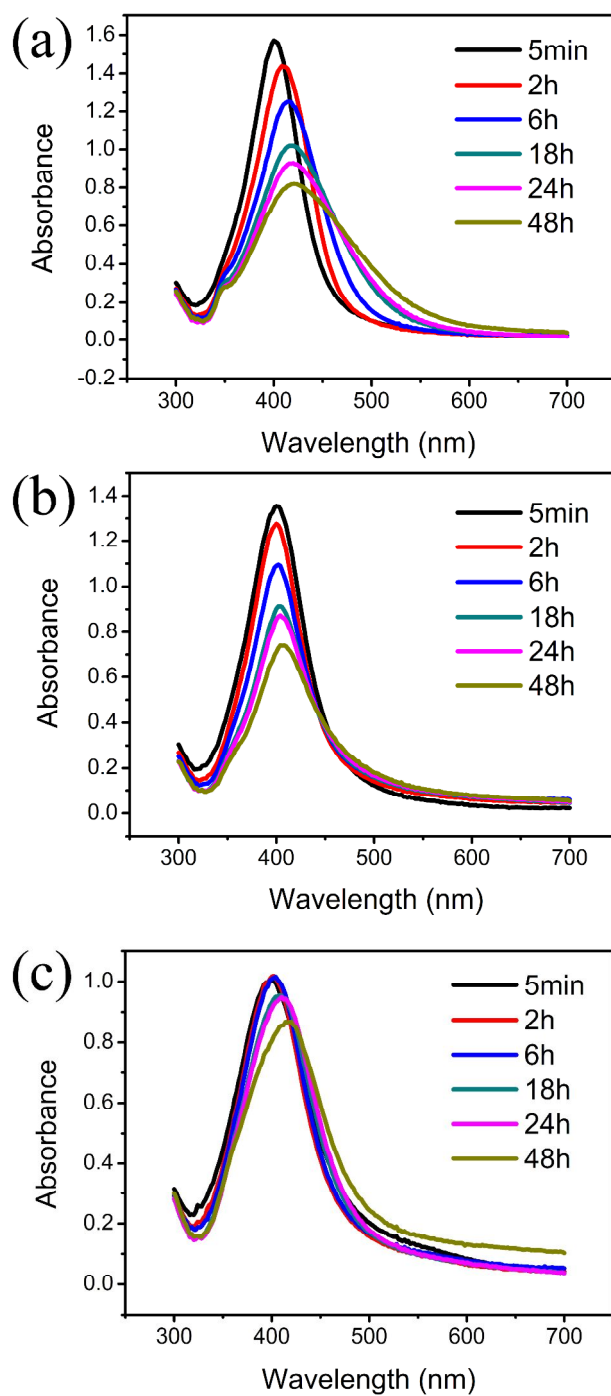

**Figure S6.** Time-dependent optical spectra of the Cu@Ag NP in the presence of (a) Cl<sup>-</sup> (1 mM), (b) Br<sup>-</sup> (10 μM), and (c) I<sup>-</sup> (10 μM), pH 5.2.

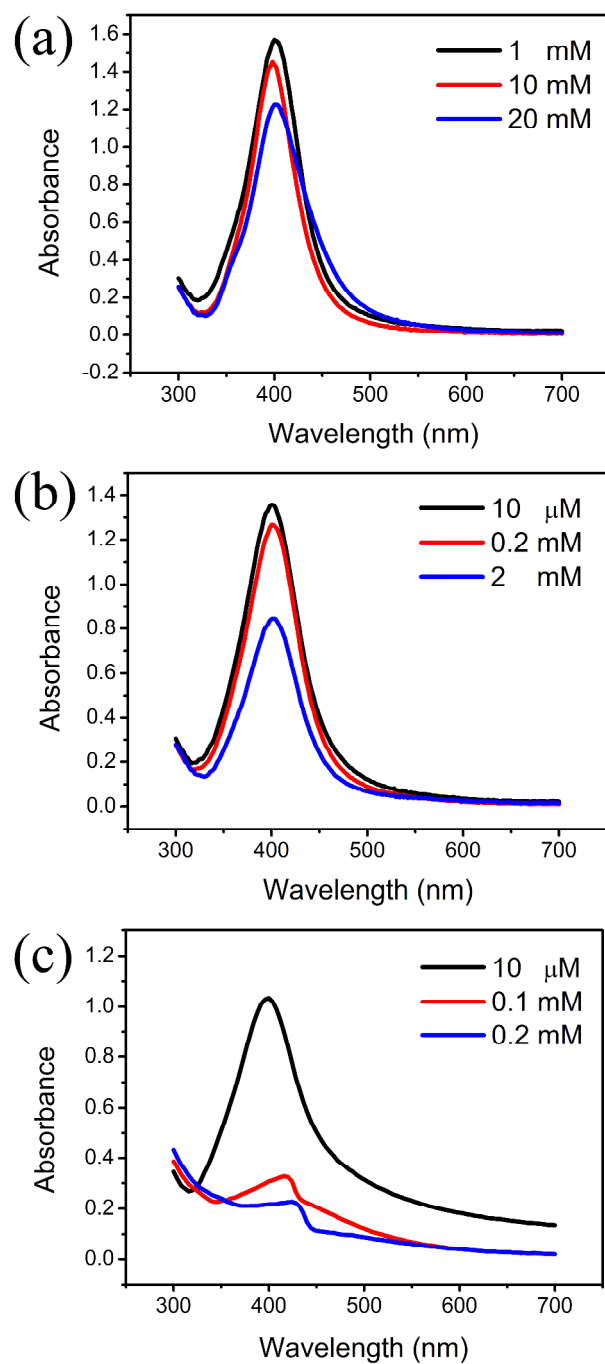

**Figure S7.** Concentration-dependent optical spectra of the Cu@Ag NP solution for (a)  $\text{Cl}^-$ , (b)  $\text{Br}^-$ , and (c)  $\text{I}^-$  anions, pH 5.2.



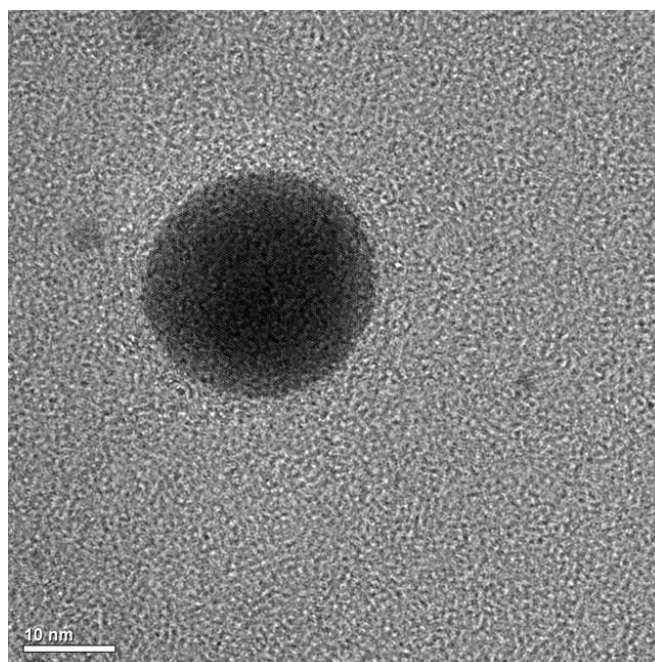

**Figure S8.** The enlarged TEM image of the Cu@Ag NP after interaction with iodide ( $10\ \mu\text{M}$ ) for 2 h.

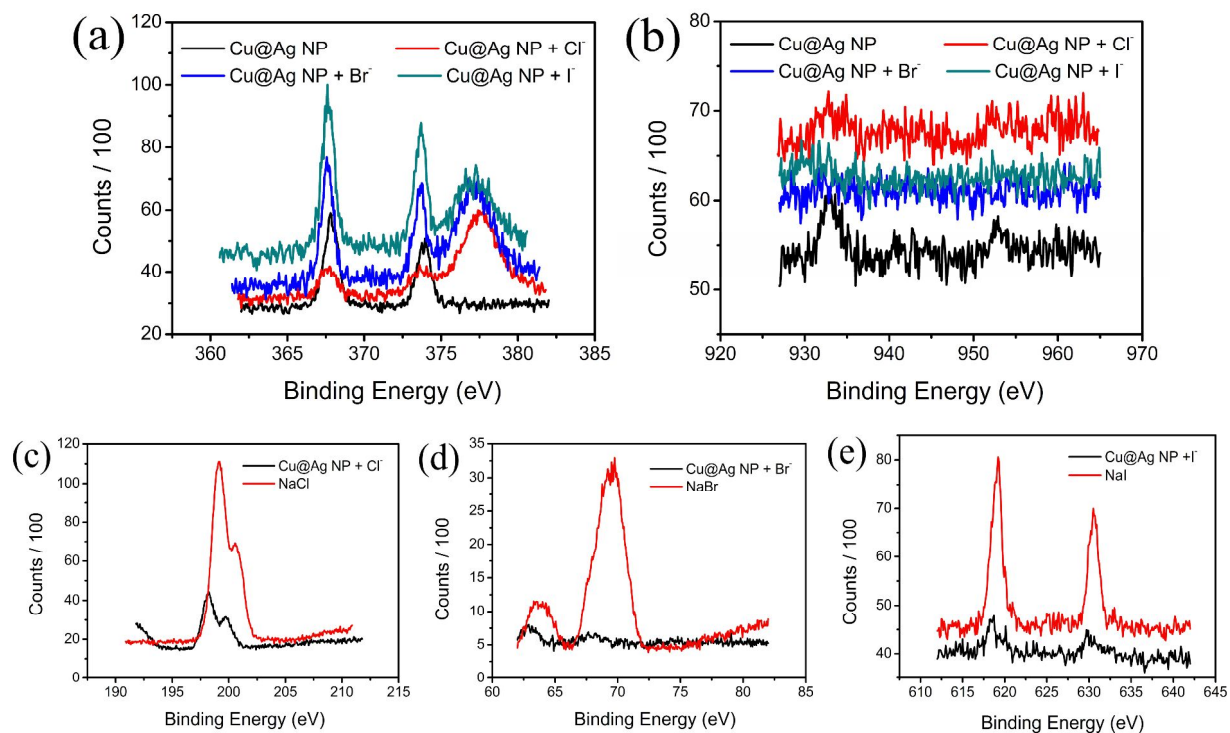

**Figure S9.** XPS spectra relative to (a) Ag and (b) Cu for the native Cu@Ag NP and the reorganized NP after interaction with halides. XPS spectra relative to (c) Cl<sup>-</sup>, (d) Br<sup>-</sup>, and (e) I<sup>-</sup> for the reorganized NP after interaction with halides and the sodium halide salts.

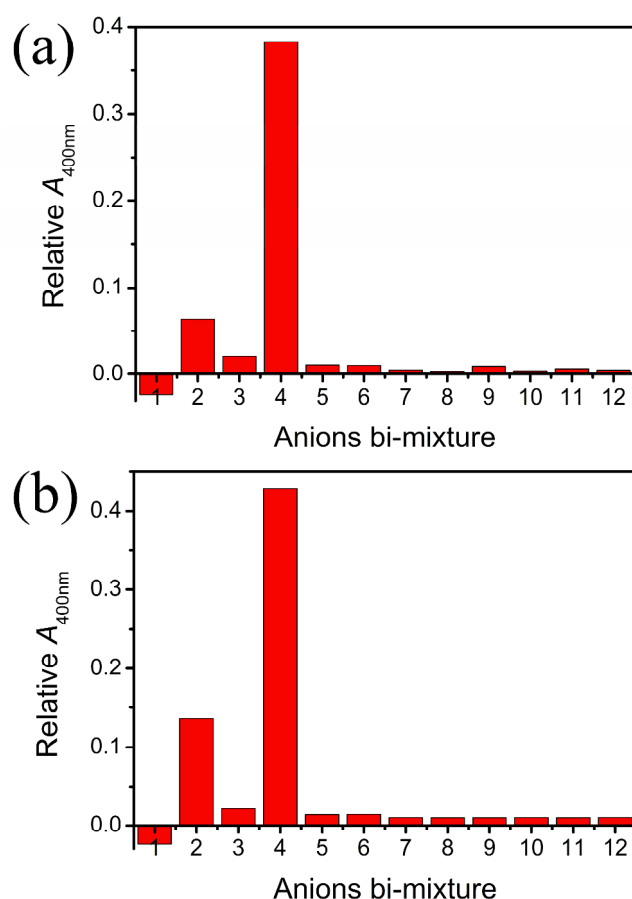

**Figure S10.** The manifestation of selectivity for the detection of (a) iodide (5  $\mu\text{M}$ ) and (b) sulfide (5  $\mu\text{M}$ ) in the presence of chloride (1 mM) and other anions. The other anion for 1-12 in (a) represents  $\text{Cl}^-$  (0.1 mM),  $\text{Br}^-$  (10  $\mu\text{M}$ ),  $\text{SCN}^-$  (10  $\mu\text{M}$ ),  $\text{S}^{2-}$  (10  $\mu\text{M}$ ),  $\text{SO}_3^{2-}$ ,  $\text{C}_2\text{O}_4^{2-}$ ,  $\text{NO}_3^-$ ,  $\text{NO}_2^-$ ,  $\text{SO}_4^{2-}$ ,  $\text{CO}_3^{2-}$ ,  $\text{AcO}^-$ , and  $\text{HCOO}^-$  (all 0.1 mM), respectively. The other anion for 1-12 in (b) represents  $\text{Cl}^-$  (0.1 mM),  $\text{Br}^-$  (10  $\mu\text{M}$ ),  $\text{SCN}^-$  (10  $\mu\text{M}$ ),  $\text{I}^-$  (10  $\mu\text{M}$ ),  $\text{SO}_3^{2-}$ ,  $\text{C}_2\text{O}_4^{2-}$ ,  $\text{NO}_3^-$ ,  $\text{NO}_2^-$ ,  $\text{SO}_4^{2-}$ ,  $\text{CO}_3^{2-}$ ,  $\text{AcO}^-$ , and  $\text{HCOO}^-$  (all 0.1 mM), respectively.
